# Supplementary material for: Projected climate change in Fennoscandia – and its relation to ensemble spread and global trends
Source: Copernicus journal article supplement (doi:10.5194/egusphere-2025-2002), 2025-05-28
Supplement: Supplementary file 1 [file egusphere-2025-2002-supplement.pdf]

## Supplementary to *Projected climate change in Fennoscandia — and its relation to ensemble spread and global trends*

Strandberg et al., 2025

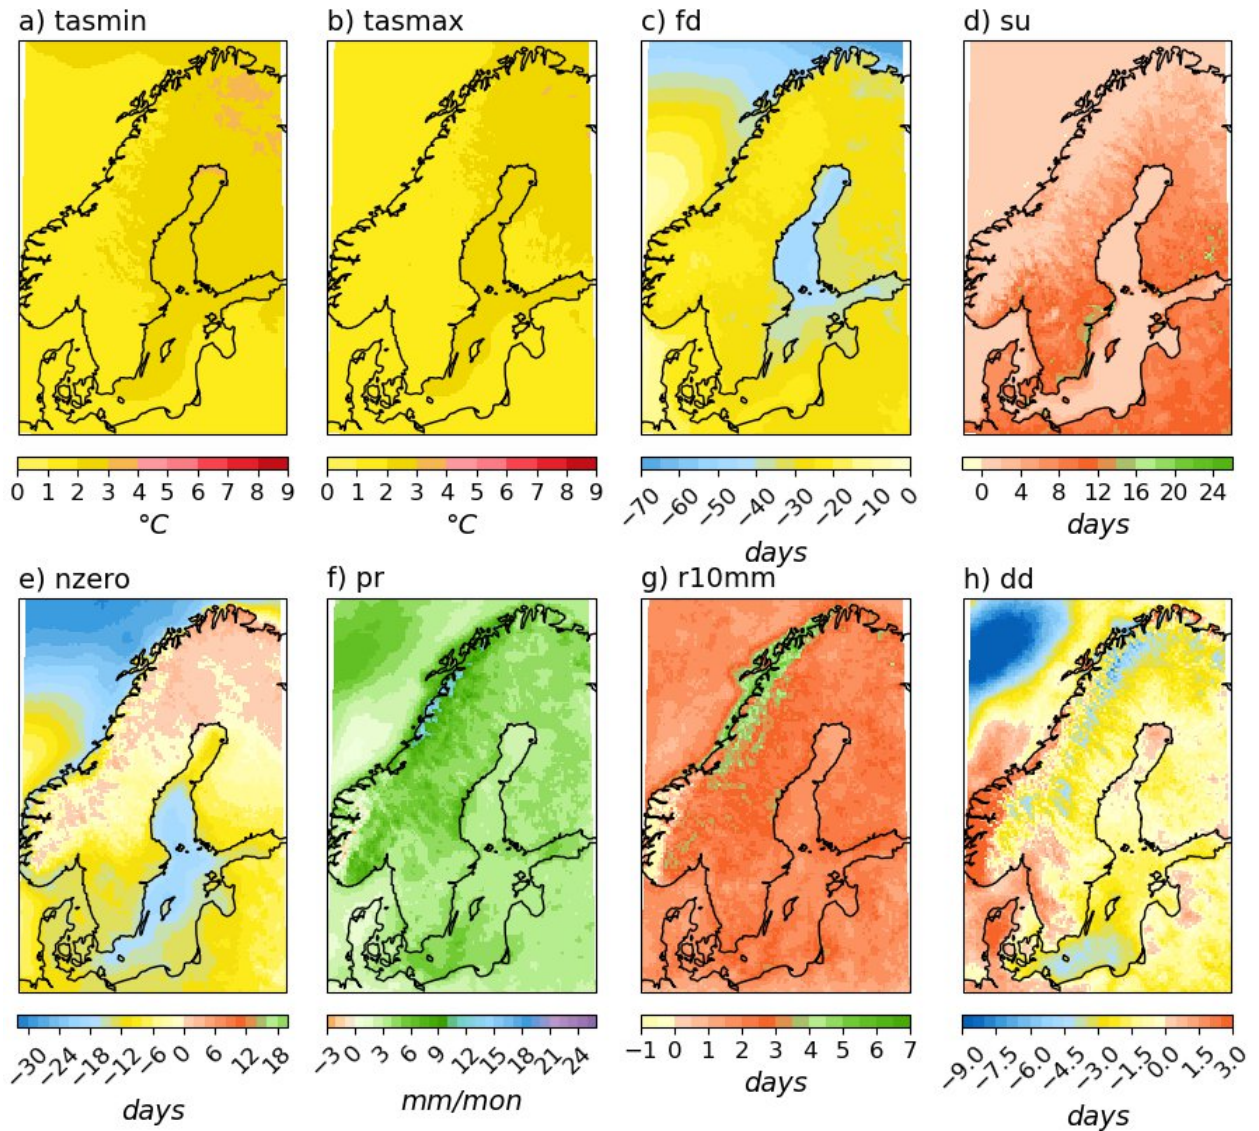

**Figure S1** Climate change anomalies between 1971 — 2000 and 2071 — 2100 according to scenario RCP2.6. The maps show ensemble means of a) daily minimum temperature (tasmin, °C), b) daily maximum temperature (tasmax, °C), c) number of frost days (fd, days), d) number of summer days (su, days), e) number of days with zero crossings (nzero, days), f) mean precipitation (pr, mm/day), g) number of days with heavy precipitation (r10mm, days) and h) dry days (dd, days). See table 1 for definitions of the indicators.

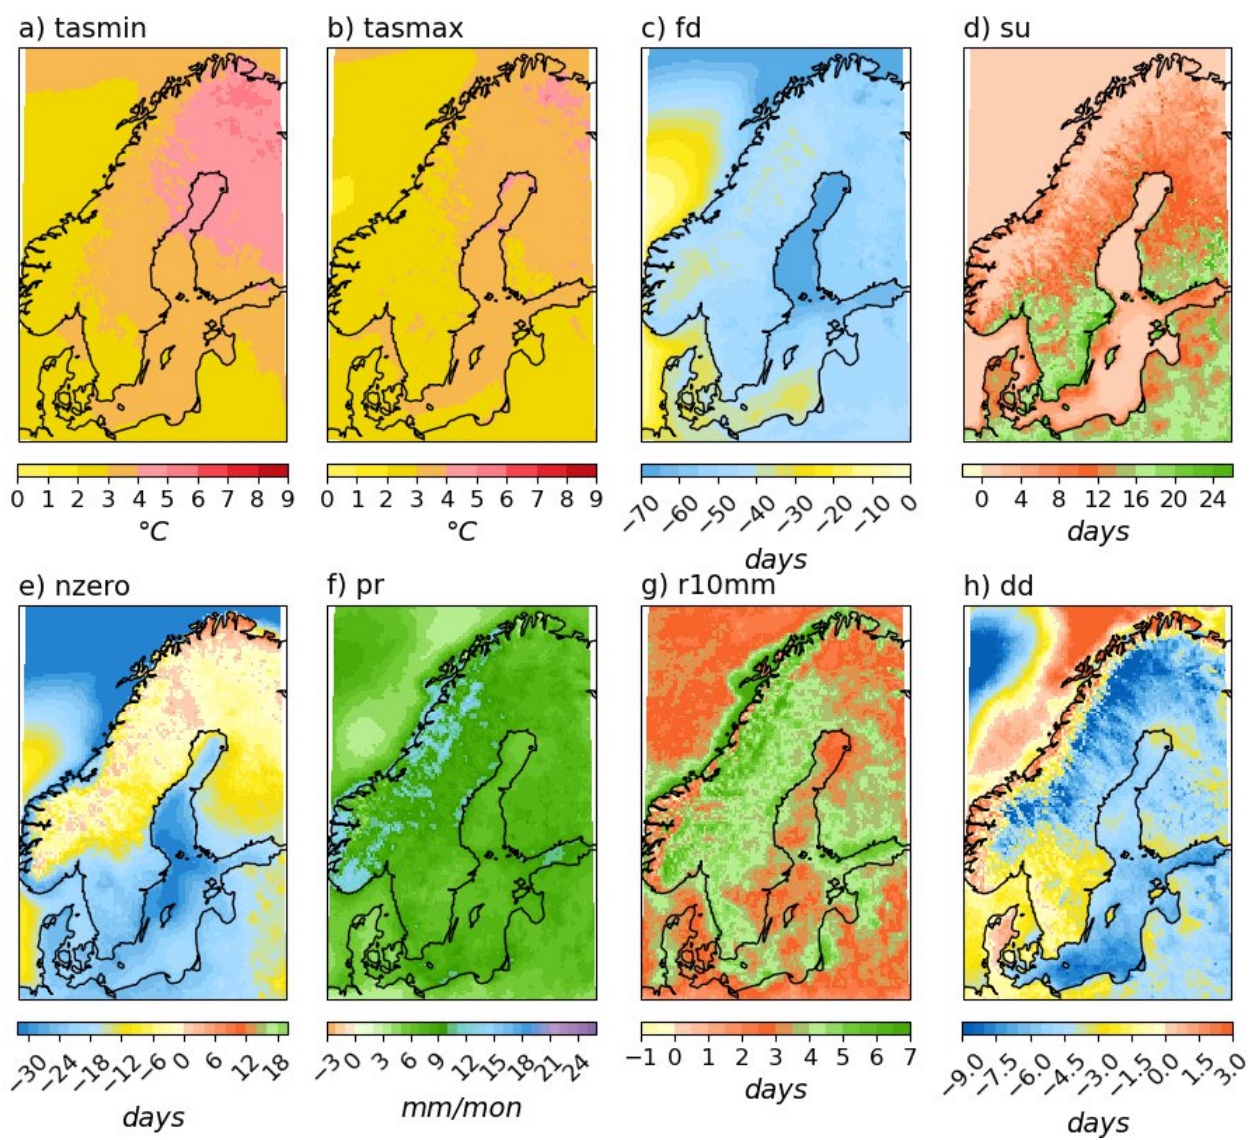

**Figure S2** Same as S1, but for RCP4.5



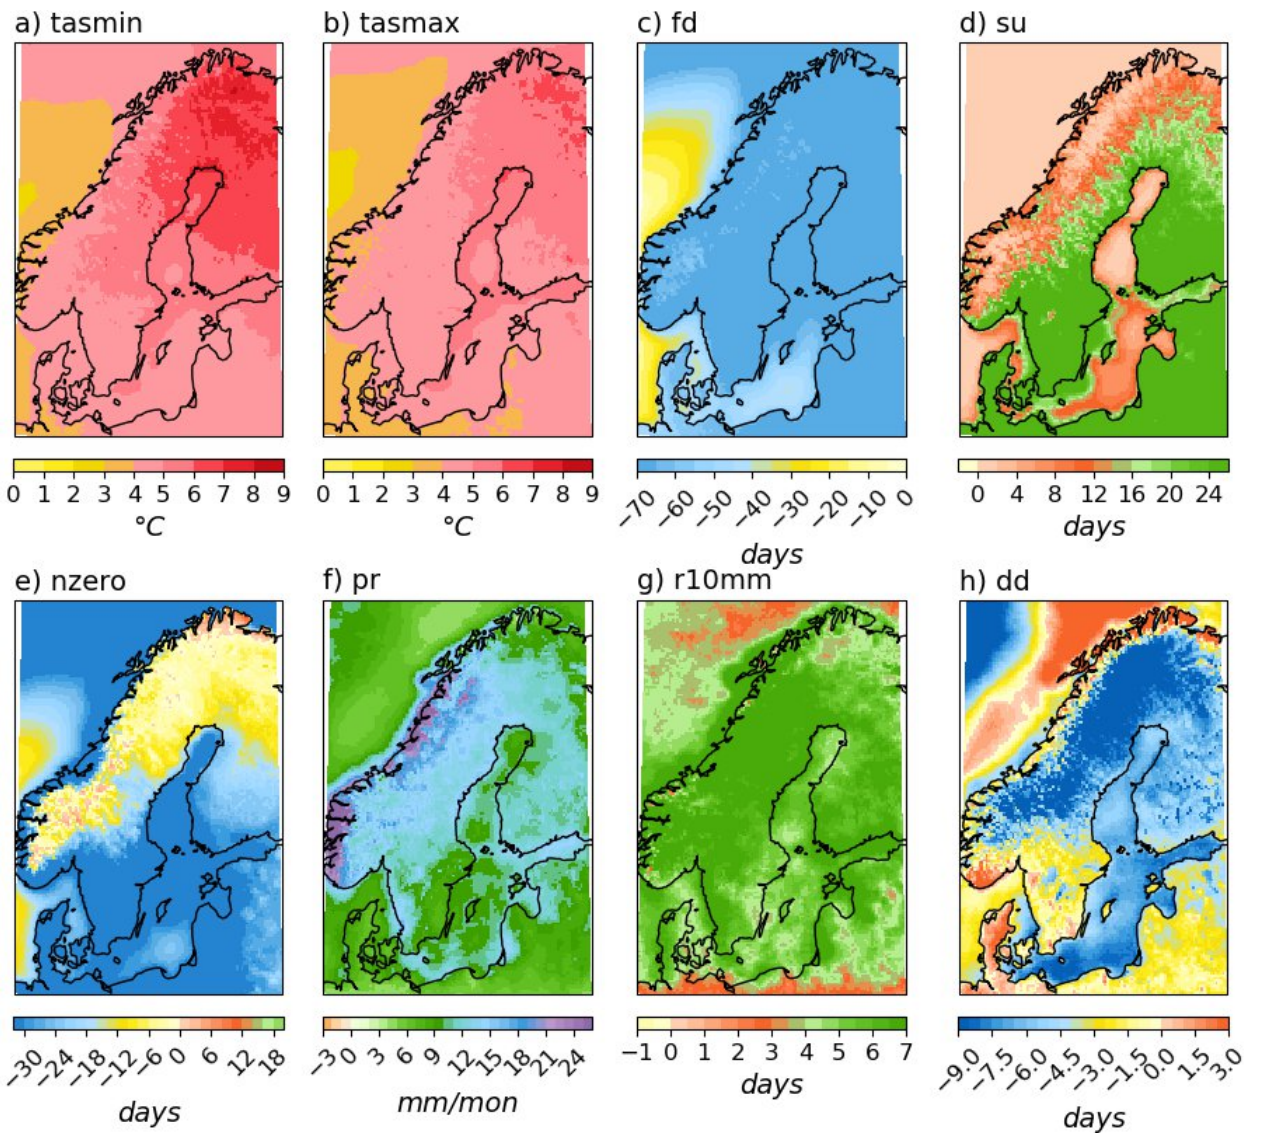

**Figure S3** Same as S1, but for RCP8.5

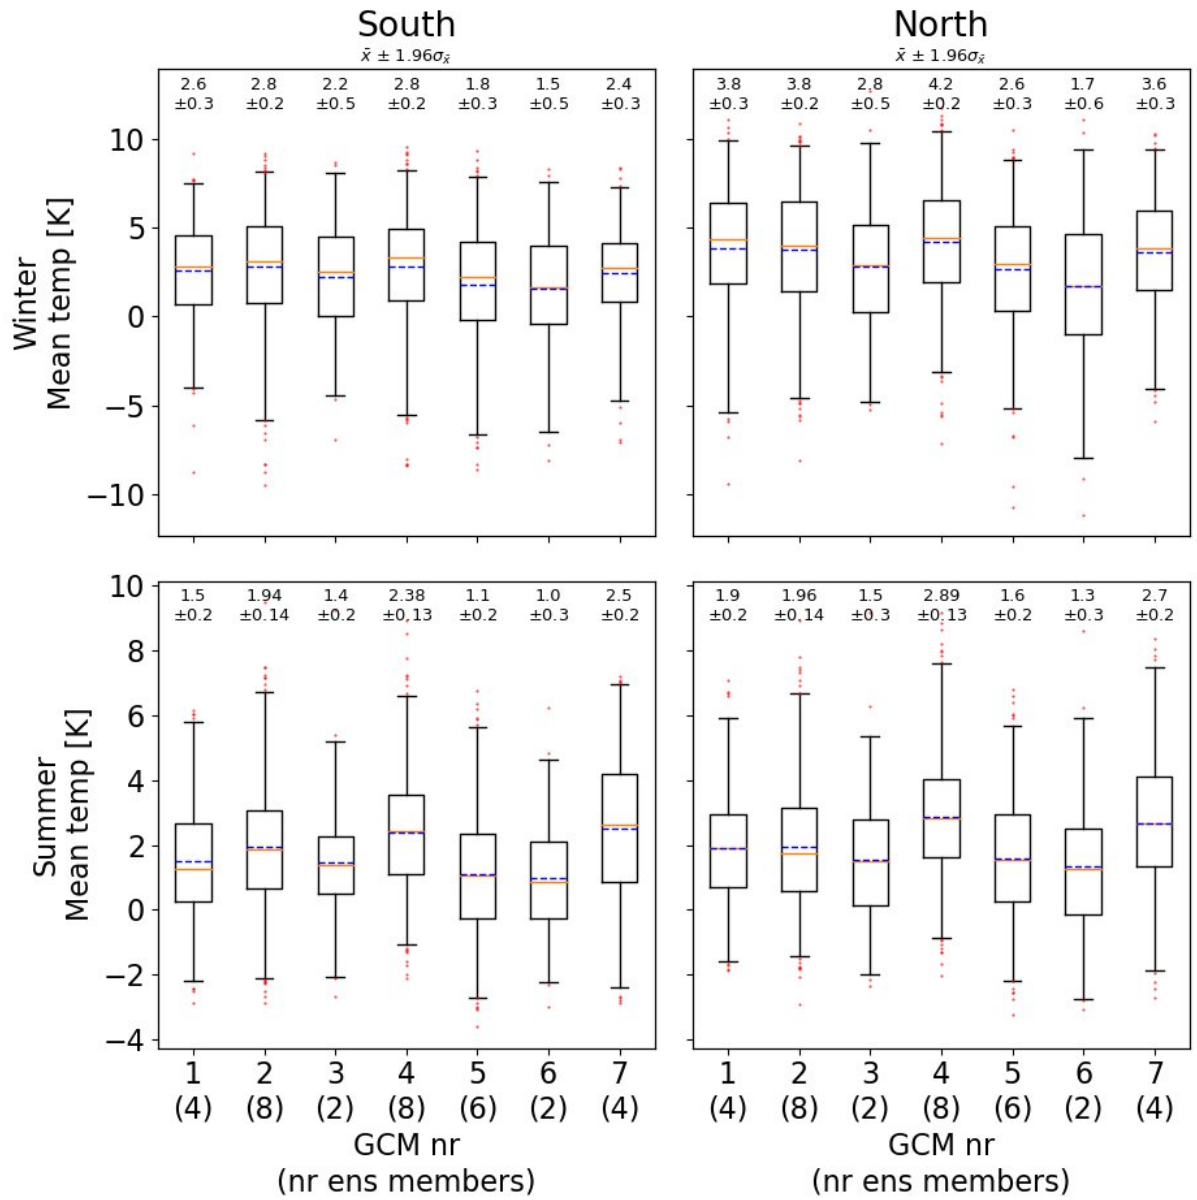

**Figure S4** Temperature differences between the period 1971-2000 and GWL2 for winter (top row) and summer (bottom row) in southern Sweden (left) and northern Sweden (right). Numbers indicate sub-ensemble numbers, with the number of members in parenthesis.

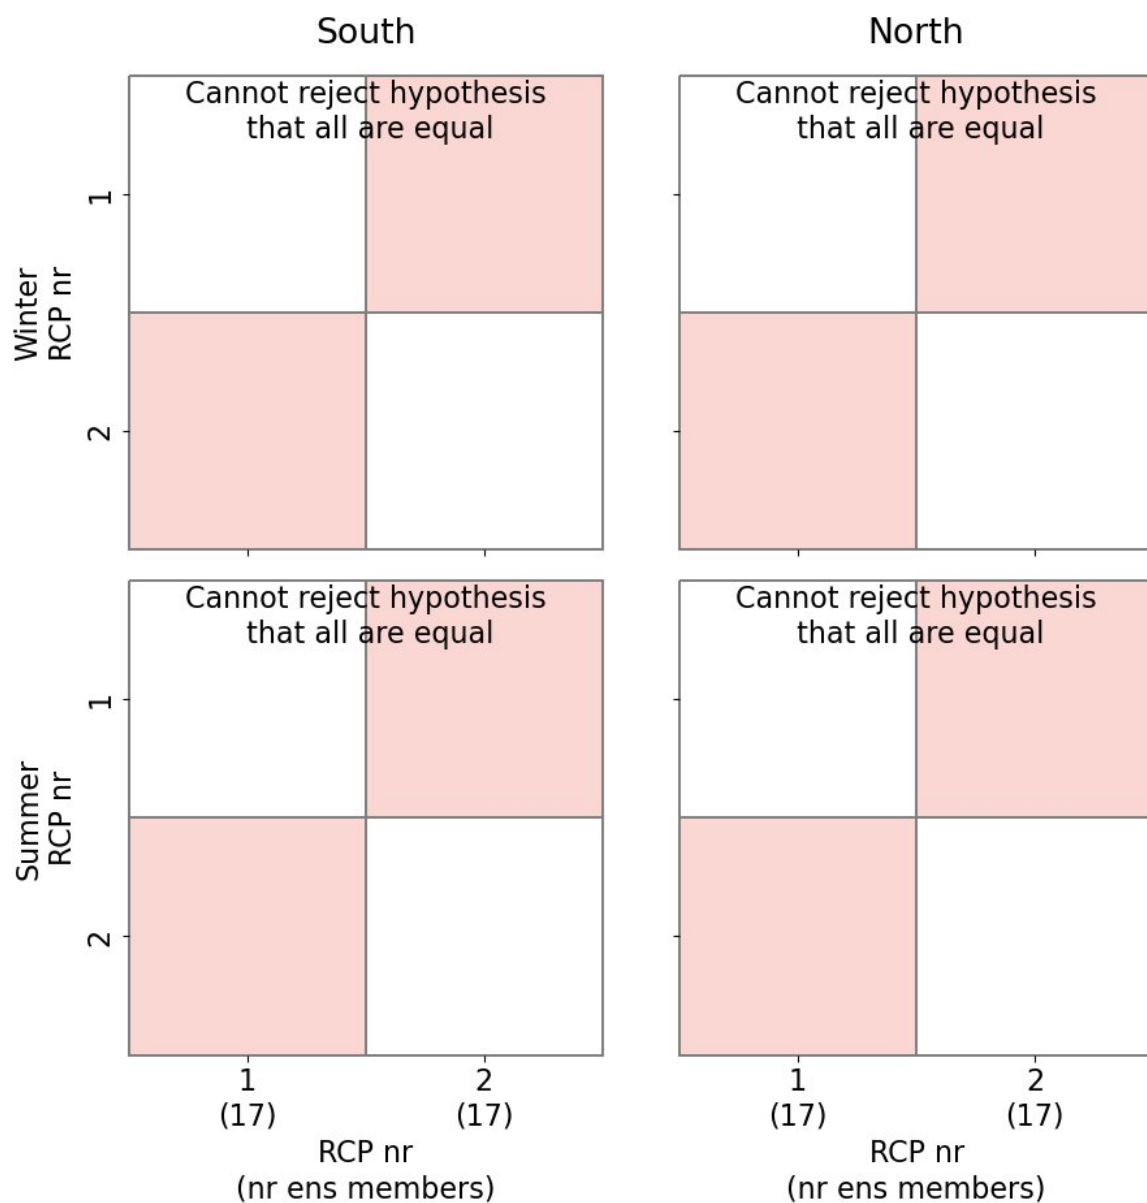

**Figure S5** Matrix of significant differences in tas between RCP-based sub-ensembles. Numbers indicate sub-ensemble numbers, with the number of members in parenthesis. Since there are no significant differences it is not possible to reject the hypothesis that they are all equal.
